# Supplementary material for: Indirect dynamics in SN2@N: insight into the influence of central atoms
Source: Royal Society of Chemistry journal article supplement (doi:10.1039/c7cp04199c), 2017-01-01
Supplement: c7cp04199c1.pdf [file c7cp04199c1.pdf]

**Indirect dynamics in  $S_N2@N$ . Insight into the influence of central atom**

Xu Liu,<sup>a</sup> Chenyang Zhao,<sup>a</sup> Li Yang,<sup>\*,a</sup> Jiaxu Zhang<sup>\*,a</sup> and Rui Sun<sup>b</sup>

<sup>a</sup>MIIT Key Laboratory of Critical Materials Technology for New Energy Conversion and  
Storage,

School of Chemistry and Chemical Engineering,

Harbin Institute of Technology,

Harbin 150001, P. R. China

<sup>b</sup>Department of Chemistry,  
University of Chicago,  
Chicago, Illinois 60637, United States

Author E-mail Address: yangli2014@hit.edu.cn, zhjx@hit.edu.cn

Table S1. Average fractions of  $F^- + NH_2Cl \rightarrow NH_2F + Cl^-$  product energy partitioning<sup>a</sup>

|                                          | $f_{rot}'$      | $f_{vib}'$      | $f_{trans}'$    | $f_{int}'$      |
|------------------------------------------|-----------------|-----------------|-----------------|-----------------|
| $E_{coll} = 300K (0.9 \text{ kcal/mol})$ |                 |                 |                 |                 |
| Direct rebound                           | $0.07 \pm 0.03$ | $0.45 \pm 0.10$ | $0.48 \pm 0.10$ | $0.52 \pm 0.10$ |
| Direct stripping                         | $0.03 \pm 0.01$ | $0.28 \pm 0.14$ | $0.70 \pm 0.13$ | $0.30 \pm 0.13$ |
| Indirect                                 | $0.22 \pm 0.02$ | $0.53 \pm 0.02$ | $0.26 \pm 0.02$ | $0.74 \pm 0.02$ |
| Total                                    | $0.21 \pm 0.02$ | $0.51 \pm 0.02$ | $0.28 \pm 0.02$ | $0.72 \pm 0.02$ |
| $E_{coll} = 40 \text{ kcal/mol}$         |                 |                 |                 |                 |
| Direct rebound                           | $0.15 \pm 0.08$ | $0.28 \pm 0.07$ | $0.57 \pm 0.09$ | $0.43 \pm 0.09$ |
| Direct stripping                         | $0.17 \pm 0.01$ | $0.22 \pm 0.04$ | $0.61 \pm 0.03$ | $0.39 \pm 0.03$ |
| Indirect                                 | $0.11 \pm 0.02$ | $0.56 \pm 0.03$ | $0.33 \pm 0.03$ | $0.67 \pm 0.03$ |
| Total                                    | $0.13 \pm 0.02$ | $0.46 \pm 0.04$ | $0.42 \pm 0.03$ | $0.58 \pm 0.03$ |

<sup>a</sup>The  $f$ 's are fractions of energy partitioned to rotational, vibrational, relative translational, and internal (rotation + vibration) energy. Total is the combined partitioning for the individual mechanisms.

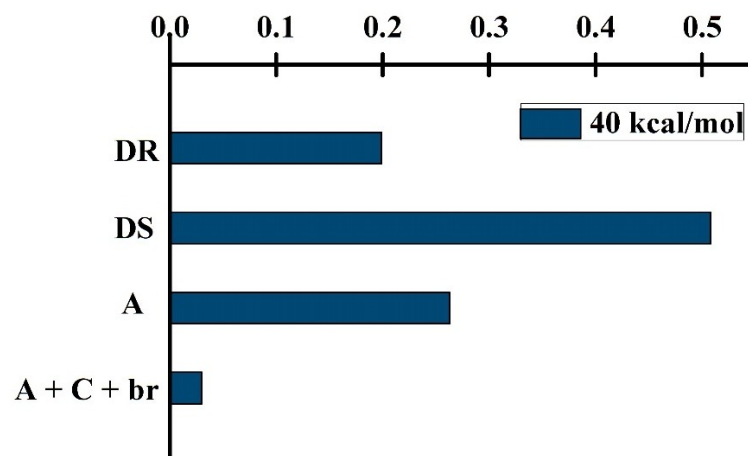

Figure S1. Fractions of the atomistic mechanisms for  $\text{F}^- + \text{NH}_2\text{Cl} \rightarrow \text{HF} + \text{NHCl}^-$  proton transfer reaction at a collision energy of 40 kcal/mol. DR, direct rebound; DS, direct stripping; A,  $\text{F}^-$ - $\text{H}\text{N}\text{H}\text{Cl}$ ; C,  $\text{NHCl}^-$ - $\text{HF}$ ; br, barrier recrossing. DR and DS are direct mechanisms, and others are indirect events.

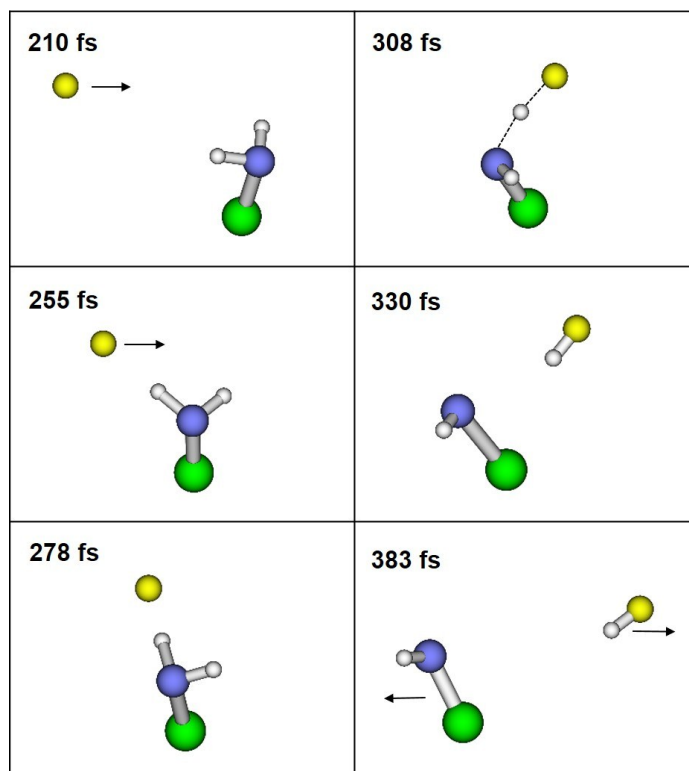

Figure S2. Atomistic dynamics of a typical trajectory for the direct stripping mechanism that dominates the  $\text{F}^- + \text{NH}_2\text{Cl} \rightarrow \text{HF} + \text{NHCl}^-$  proton transfer reaction at a collision energy of 40 kcal/mol.

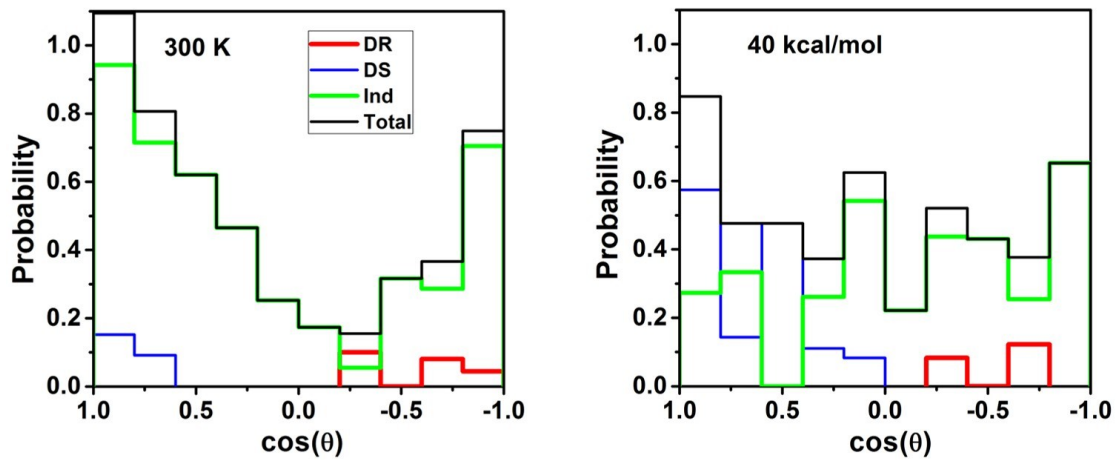

Figure S3. Velocity scattering angle distributions for the  $F^- + NH_2Cl \rightarrow NH_2F + Cl^-$   $S_N2$  reaction at 300 K and 40 kcal/mol collision energies. The results are illustrated for the individual direct rebound (red), direct stripping (blue), and indirect (green) mechanisms and for the total scattering (black).
